1 **Megakaryocytes Display Innate Immune Cell Functions and Respond during Sepsis**

2

3 Galit H. Frydman<sup>1, 2, †\*</sup>, Felix Ellett<sup>2, †</sup>, Julianne Jorgensen<sup>2</sup>, Anika L. Marand<sup>2</sup>, Lawrence  
4 Zukerberg<sup>3</sup>, Martin Selig<sup>3</sup>, Shannon Tessier<sup>2</sup>, Keith H. K. Wong<sup>2</sup>, David Olaleye<sup>1</sup>, Charles R.  
5 Vanderburg<sup>4</sup>, James G. Fox<sup>1</sup>, Ronald G. Tompkins<sup>2</sup>, and Daniel Irimia<sup>2\*</sup>

6

7 <sup>1</sup>Division of Comparative Medicine and Department of Biological Engineering, Massachusetts  
8 Institute of Technology, Cambridge, Massachusetts, United States of America.

9 <sup>2</sup>BioMEMS Resource Center and Center for Surgery, Innovation & and Bioengineering,  
10 Department of Surgery, Massachusetts General Hospital, Boston, Massachusetts, United States  
11 of America.

12 <sup>3</sup>Department of Pathology, Massachusetts General Hospital, Boston, Massachusetts, United  
13 States of America.

14 <sup>4</sup>Harvard Neurodiscovery Center. Harvard Medical School. Boston, Massachusetts, United States  
15 of America.

16

17 †These authors contributed equally to the paper.

18

19 **\* Corresponding authors:**

20 Galit H. Frydman, DVM, ScD; [grydman@mit.edu](mailto:grydman@mit.edu)

21 Daniel Irimia, MD, PhD; [dirimia@hms.harvard.edu](mailto:dirimia@hms.harvard.edu)

22

23 **Abstract**

24 Megakaryocytes (MKs) are precursors to platelets, the second most abundant cells in the  
25 peripheral circulation. However, while platelets are known participate in immune responses and  
26 play significant roles during infections, the role of MKs within the immune system has not been  
27 explored. Here we utilize *in vitro* techniques to show that both cord blood-derived MKs (CB  
28 MKs) and MKs from a human megakaryoblastic leukemia cell line (Meg-01) chemotax towards  
29 pathogenic stimuli, phagocytose bacteria, and release chromatin webs in response to bacteria.  
30 Moreover, in patients with sepsis, we found that MK counts were significantly higher in the  
31 peripheral blood, and CD61<sup>+</sup> staining was increased in the kidneys and lungs, correlated with the  
32 development of organ dysfunction. Overall, our study suggests that MK cells display basic innate  
33 immune cell functions and respond during infections and sepsis.

34 Megakaryocytes (MKs) are commonly recognized as key participants in hemostatic processes  
35 through the production of platelets<sup>1-2</sup>. In addition to their presence in the bone marrow, MKs can  
36 also be located in the lungs, lymph nodes, spleen, and liver during extra medullary hematopoiesis<sup>3-  
37 7</sup>. MKs have also been reported to be significantly increased in the lungs during severe pulmonary  
38 inflammation, such as acute respiratory distress syndrome (ARDS), when they are believed to  
39 promote inflammation via the release of platelets<sup>8-10</sup>. The current paradigm by which MKs are  
40 increased in the lungs during ARDS revolves around MKs passive escape from the bone marrow,  
41 entrance to arterial circulation, and passive mechanical entrapment within the microcirculatory bed  
42 of the alveoli<sup>4,11-12</sup>.

43

44 The participation of MKs in immune responses is suggested by several anecdotal observations<sup>19</sup>.  
45 Maturing MKs express both major histocompatibility complex (MHC) class I and II molecules  
46 and a variety of toll-like receptors (TLRs) on their cell surface<sup>13-19</sup>. MKs, just like platelets, also  
47 contain various granule types, including lysosomes, which participate in the endocytosis and  
48 degradation of pathogens<sup>20</sup>. MKs can play antigen-presenting-cell (APC) roles and stimulate Th-  
49 17 responses in lupus<sup>13,21</sup>. Thrombocytes, the amphibian equivalent of the mammalian  
50 MK/platelet, actively phagocytose live bacteria<sup>23-25</sup>. In mammals, MKs internalize viruses,  
51 including dengue virus and HIV, and multiple case reports show evidence for MKs containing  
52 fungi<sup>26-29</sup>. Although such reports provide sporadic support for an active role for MKs in the  
53 immune responses, this function of MKs has not been tested systematically.

54

55 Here, we show that the human MKs can engulf pathogens, release chromatin nets, and undergo  
56 chemotaxis in gradients of standard chemoattractants. Moreover, we find that during sepsis, the

57 number of large CD61<sup>+</sup>CD41<sup>+</sup> cells increases in peripheral circulation, and the number of large  
58 CD61<sup>+</sup> cells increases in peripheral organs. These numbers are higher during acute kidney injury  
59 (AKI), ARDS, and in disseminated intravascular coagulation (DIC).

60

## 61 RESULTS

### 62 MKs are phagocytic

63 We tested the capacity of CB MKs and Meg-01 cells to engulf *E. coli*, *S. aureus*, or *S. pyogenes*  
64 (**Figure 1**). We used light microscopy to verify the association of bacteria with the cell membrane  
65 (**Figure 1A**) and transmission electron microscopy to confirm the internalization of bacteria by  
66 MK and platelets (**Figure 1B**). Labeling the pathogens with pHrodo, a marker that fluoresces red  
67 following acidification, confirmed the uptake of the bacteria within phagosomes (**Figure 1C** and  
68 **Figure S2**). Although the Meg-01 cells are noted to have strong auto fluorescence (both red and  
69 green), the observation of the rod-shaped, bright red stained *E. coli*, further confirms the  
70 internalization of the bacteria by the Meg-01 cells. Interestingly, electron micrographs of a  
71 spontaneously contaminated CB MK culture at day 14 of differentiation revealed one large cell  
72 with multiple bacteria of unknown origin within an expansive vacuole (**Figure 1B**).

73

74 We incubated CB MKs at different stages of differentiation (day 0-14) with bacteria. We  
75 confirmed appropriate MK maturation by measuring surface-marker expression using flow  
76 cytometry (**Figure S3**). We found that CB MKs were capable of phagocytosis of *E. coli* starting at  
77 day 10 of differentiation (**Figure S2A**). This corresponds temporally to the onset of P-selectin  
78 glycoprotein ligand 1 (CD162) and MHC Class II (HLADR) expression (**Figure S3**). Cells also  
79 appeared to be capable of internalizing zymosan particles during overnight incubation, although  
80 this response was less robust compared to that against bacteria (**Figure S2B**). Meg-01 also  
81 phagocytose bacteria. Interestingly, Meg-01 phagocytose *beta-hemolytic E. coli* more efficiently  
82 compared to *non-beta-hemolytic E. coli* (data not shown), suggesting that various specific  
83 receptors and pathogen-cell interactions take place prior to internalization.

84

85 **MKs undergo chemotaxis**

86 We tested the ability of Meg-01 cells to chemotax towards LPS and zymosan particles in in  
87 microfluidic as well as traditional transwell assays (**Figure 2**). In microfluidic assays, we observed  
88 Meg-01 chemotaxis at single cell resolution and distinguished three phenotypic groups. Cells in  
89 the first group migrated through the side channels and entered the circular reservoirs. Cells in the  
90 second groups remained in the side channels and extended projections into the side channels.  
91 Finally, cells in the third group remained in the side channels (**Figure 2B-C** and **Figure S5**).  
92 Strikingly, the size of the cells was not an impediment for cell migration and large Meg-01 cells,  
93 up to 75  $\mu\text{m}$  in diameter, actively migrated through 4.5  $\mu\text{m}$  high and 10.5  $\mu\text{m}$  wide channels. We  
94 observed nuclei and organelle displacement (**Video 1-3**), with some moving cells carrying  
95 zymosan particles within them (**Video 4**). A small proportion of cells did not fully traverse the  
96 channel, but instead extended portions into side channels containing chemoattractant. These  
97 projections released small cell fragments (platelets or apoptotic bodies) towards the stimulus  
98 (**Figure 2D** and **Video 5**). We also observed cells migrating into the side channels and then  
99 releasing platelets or vesicles, effectively obstructing the side channel and preventing other cells  
100 from entering (**Video 6**).

101

102 Chemotaxis of Meg-01 and MK cells towards the various stimuli in the microfluidic assay was  
103 consistent with traditional transwell assays (**Figure 2E-F**). In transwell experiments, the fraction  
104 of Meg-01 cells that migrated towards LPS at concentrations of 220  $\text{pg/mL}$  and 2.2  $\text{ng/mL}$  was  
105 4.1-8.5 % and 16.0-21.0 %, respectively. The fraction of cells migrating towards zymosan  
106 particles was comparable: 7.6-21.8%. When LPS or SDF1- $\alpha$  was combined with zymosan

107 particles, the average chemotaxis fraction increased slightly (7.1-33.7%). The positive control  
108 chemotaxis response of Meg-01 cells towards SDF1- $\alpha$  was between 13.7-20.4 %, consistent with  
109 previous reports.<sup>35</sup>

110

### 111 **MKs release chromatin webs**

112 We observed that Meg-01 cells incubated with live bacteria or LPS change their cell morphology  
113 and release histone-decorated chromatin webs (**Figure 3**). Measurements of extracellular double  
114 stranded-DNA (dsDNA) in the supernatant show proportional increase of chromatin webs release  
115 with the concentration of LPS (**Figure 3B**). Fluorescent imaging of CB MKs co-incubated with  
116 live pHrodo conjugated *E. coli* helped visualize the chromatin webs and their filamentous structure  
117 (**Figure 3C**). During the early phase of chromatin web release, the nucleus of the cells is also  
118 stained by the Hoechst dye, which disappears in the late stages, consistent with recent reports in  
119 the context of neutrophil extracellular trap (NETs) release<sup>36</sup>. Co-incubation with heat-killed *E.*  
120 *coli* resulted in a less robust response compared to live bacteria (data not shown), consistent with  
121 literature on NET formation being dependent on bacterial motility<sup>37</sup>. Immunofluorescent imaging  
122 confirms the presence of extracellular histones and myeloperoxidase along with the chromatin  
123 webs (**Figure S6**).

124

125 Electron micrograph imaging of Meg-01 cells co-incubated with live bacteria confirmed the  
126 presence of bacteria entangled within the chromatin webs along with various organelles, including  
127 extracellular mitochondria, granules, and nucleosomes (**Figure 3E-F**). Calcein staining  
128 demonstrates the lack of cell membrane around the chromatin webs and helps differentiate between  
129 cell death with intracellular content release. Calcein staining also differentiates from pro-platelet

130 budding events, when the platelet buds are stained by calcein and are negative for DNA (**Figure**  
131 **3D**). Other cell morphology changes consistent with both cell lysis and extracellular trap formation  
132 included swollen nuclei, breakdown of the nuclear membrane, decondensed chromatin, and re-  
133 localization of the cytoplasmic organelles and mitochondria <sup>38,39</sup>. Furthermore, Meg-01 cells  
134 expressing GFP-H2B were imaged actively releasing their intracellular contents; which confirmed  
135 the perinuclear rearrangement of organelles (notably, mitochondria) (**Figure 3G-H**). In the case  
136 of MKs incubated with LPS, chromatin webs were released along the border of a hydrophobic pen  
137 marking on a glass slide. This was consistent with previous publications reporting NET formation  
138 upon contact with hydrophobic surface materials<sup>40</sup>.

139

#### 140 **MKs are increased in the peripheral venous circulation during sepsis**

141 We employed imaging flow cytometry to probe the presence of MKs in peripheral blood samples  
142 from patients. Circulating MKs were on average 10  $\mu\text{m}$  in size and defined by the presence of  
143 CD61 and CD41 markers and Draq5 staining of the nucleus. We differentiated MKs from platelet-  
144 leukocyte aggregates by the distribution of markers, which was uniform throughout the cell  
145 membrane for MK cells and punctate when a platelet attaches to a lymphocyte (**Figure 4A**). The  
146 number of CD61<sup>+</sup>CD41<sup>+</sup>Draq5<sup>+</sup> cells were significantly higher in peripheral circulation in patients  
147 with sepsis compared to controls ( $p = 0.05$ ;  $9565 \pm 1675$  MK/mL vs  $3502 \pm 741$  MK/mL,  
148 respectively) (**Figure 4Bi**). Interestingly, MKs appeared to specifically be significantly increased  
149 in patients with ‘complicated’ ( $n = 9$ , including 2 follow-up counts on complicated patients) versus  
150 ‘uncomplicated’ sepsis ( $n = 4$ ) ( $p = 0.01$ ;  $11077 \pm 6256$  MK/mL vs  $3587 \pm 1219$  MK/mL,  
151 respectively) (**Figure 4Bii**), suggesting that there may be a correlation between the number of  
152 MKs in the peripheral venous circulation and the development of AKI or ARDS. When further



153 subdividing the sepsis patient population by the source of the infection, patients with gram negative  
154 bacterial infections (n = 3) had significantly higher MK counts compared to those with gram  
155 positive bacterial infections (n = 7) (p < 0.01) but not those with the mixed infections (n = 3) (p =  
156 0.13) (15070 ± 5158 MK/mL, 5140 ± 2082 MK/mL, 10146 ± 7675 MK/mL, respectively) (**Figure**  
157 **4Biii**).

158

### 159 **Automated analyzers fail to identify circulating MKs**

160 We tested whether standard automated blood counting methods could identify circulating MKs  
161 (**Figure S1**). In an automated CBC analyzer, pure CB MKs were detected and categorized as an  
162 unknown type of white blood cells (WBCs) with an error notification. However, when CB MKs  
163 were spiked into whole blood samples, the automated analyzer categorized the additional cells as  
164 neutrophils, measured a corresponding increase in the WBC numbers, and did not display an error  
165 message (**Figure S1D**). Meg-01 cells could not be counted or analyzed accurately by the  
166 automated analyzer, neither as a pure population nor when spiked into whole blood. This is likely  
167 due to the differences in size between these two populations. While CB MKs are 10-30 µm and  
168 resemble small, granular lymphocytes on light microscopy, Meg-01 cells range from 15-75 µm  
169 and are often found in large clusters.

170

### 171 **Large numbers of circulating MKs correlate with worse prognosis in sepsis patients**

172 To investigate whether MK enumeration in the circulation might be used to predict prognosis, we  
173 analyzed samples from three sepsis patients at 2 time-points during their hospital stay. We  
174 observed a decrease in circulating MKs in the patient that recovered and was discharged from the  
175 hospital, as compared to the two patients that remained in the hospital for multiple weeks and

176 developed AKI (**Figure 4Biv**). Platelet count did not significantly differ in sepsis versus control  
177 patients ( $p = 0.98$ ;  $251.1 \pm 207.6$  plt  $\times 10^6/\text{mL}$  and  $253.6 \pm 34.5$  plt  $\times 10^6/\text{mL}$ , respectively),  
178 whereas there was a significant difference between sepsis and control patients in total white blood  
179 cell counts ( $p = 0.015$ ;  $14.7 \pm 9.6$  WBC  $\times 10^6/\text{mL}$  and  $5.2 \pm 1.1$  WBC  $\times 10^6/\text{mL}$ , respectively).  
180 There was no correlation between circulating MKs and platelet or white blood cell count (**Figure**  
181 **S7**). Interestingly, the circulating CD61<sup>+</sup>CD41<sup>+</sup>Draq5<sup>+</sup> cells identified in the patient samples were  
182 CD162<sup>-</sup>, which may indicate that adult MKs have a different surface phenotype to neonatal MKs,  
183 which are CD162<sup>+</sup> (**Figure S2**). Preliminary experiments aimed at identifying circulating MKs in  
184 neonatal intensive care unit (NICU) patients revealed that cells from these children appeared to be  
185 both CD34<sup>+</sup> and CD162<sup>+</sup> in addition to being CD41<sup>+</sup>Draq5<sup>+</sup> (data not shown), suggesting that  
186 circulating MK phenotype may vary with the age of the patient. While the sample size in this  
187 exploratory study is too small to draw definitive conclusions, these data suggest that circulating  
188 MKs should be further explored in the context of sepsis-related complications.

189

### 190 **Platelets and MKs are present in peripheral organs during sepsis**

191 To investigate whether CD61<sup>+</sup> cells were increased in the peripheral organs of patients with sepsis,  
192 we performed detailed histological analysis of autopsy samples from sepsis patients and non-sepsis  
193 controls. CD61<sup>+</sup> cells were defined as MKs when they were large with multi-lobular dark staining  
194 nuclei (as seen in **Figure 5A** iva-b). Per 40x field of view (FOV) of lung sections, large CD61<sup>+</sup>  
195 MKs were significantly increased in the alveoli of septic patients ( $n = 8$ ) as compared to controls  
196 ( $n = 4$ ) ( $p = 0.01$ :  $0.5 \pm 0.1$  MK/FOV vs  $1.4 \pm 0.2$  MK/FOV, respectively) (**Figure 5A-B**).  
197 Comparing H&E stained sections to corresponding CD61 IHC image showed that although MKs  
198 could generally be identified on H&E by their large, darkly-stained nucleus, this was not always

199 the case. This demonstrates the importance of utilizing IHC for accurate cell-type assessment in  
200 these types of analysis (**Figure 5A**).

201

202 One ‘control’ patient (ID C2) was removed from pulmonary MK analysis because, although the  
203 cause of death was cardiac failure, a patchy bronchopneumonia was diagnosed at autopsy; this  
204 patient also had an increased number of MKs in the lungs ( $5.4 \pm 3.5$  MK/FOV), suggesting that  
205 MKs may be increased within the pulmonary parenchyma during localized as well as systemic  
206 infections. One patient (ID 4) that died from sepsis complicated by DIC was noted to have severe  
207 pulmonary inflammation and hemorrhage, as well as a micro-abscess, as defined by an increased  
208 number of neutrophils and macrophages in the lung (**Figure S8**). Gram staining and CD61 IHC  
209 identified intracellular gram-positive cocci, along with multiple large, homogeneously stained,  
210 CD61<sup>+</sup> cells concentrated in the center of the abscess. This suggests that platelets, and possibly  
211 MKs, may have actively migrated out of the intravascular space and into the center of the abscess  
212 in response to inflammatory or bacterial signals.

213

214 Scoring of kidney sections revealed that renal glomeruli from septic patients ( $n = 7$ ) also had a  
215 significantly increased amount of CD61<sup>+</sup> positive staining than the controls ( $n = 5$ ) ( $p = 0.018$ ;  
216  $0.16 \pm 0.08\%$  CD61/Glomerulus vs  $1.07 \pm 0.23\%$  CD61/Glomerulus, respectively) (**Figure 5C-**  
217 **D**). Comparing matched H&E and CD61 IHC glomeruli staining, it was not possible to  
218 differentiate with certainty whether large CD61<sup>+</sup> areas corresponded to MKs or whether they  
219 represented platelet-rich fibrin thrombi (**Figure 5C**). One patient, who exhibited substantial  
220 microvascular thrombosis within the kidney and was diagnosed with disseminated intravascular  
221 coagulation (DIC), had significantly elevated CD61 staining ( $2.29 \pm 3.0\%$  CD61/Glomerulus),

222 consistent with the presence of platelet-rich micro thrombi within the glomerular capillaries  
223 **(Figure 5D).**

224

225

## 226 **DISCUSSION**

227 We found that MK cells display several immune cell functions, including chemotaxis,  
228 phagocytosis, and the release of histone-decorated chromatin webs, besides the traditional role in  
229 the production of platelets<sup>2</sup>. We demonstrate that, not only do MKs internalize bacteria, but they  
230 also localize the bacteria to acidified, lysosomal-type granules, which is indicative of an active  
231 killing process<sup>44,45</sup>. Our finding complements earlier observations that MKs contain various  
232 intracellular pathogens, including dengue virus, human immunodeficiency virus, and aspergillus<sup>26-</sup>  
233 <sup>29</sup>. The MK immune function complements earlier reports for platelets being ‘first responders’ to  
234 microbes and inflammatory insults, stimulating the recruitment and activation of white blood cells,  
235 and even directly trapping pathogens themselves<sup>41-43</sup>. We also found that that Meg-01 cells  
236 undergo active chemotaxis towards common inflammatory stimuli<sup>35</sup> and can migrate through  
237 channels with cross section smaller than  $50 \mu\text{m}^2$ . This size is comparable to that of small capillary  
238 vessels our observation raises the possibility that MKs are not ‘trapped’ in microcirculatory beds,  
239 but instead they may move through and diapedese into surrounding tissues where they participate  
240 in inflammation and regeneration<sup>3,47-51</sup>. Additionally, the observed directional budding of platelets  
241 into the channels containing the chemotactic agent and “obstruction” of the channels by MKs and  
242 platelets and/or vesicles, suggest an ability to contribute to decreased blood flow within small  
243 capillary vessels<sup>10,43,52-55</sup>.

244

245 We also demonstrate that MKs can release intracellular contents and generate chromatin webs.  
246 This feature is shared with an increasing number of innate immune cells that have been  
247 demonstrated to release their chromatin decondensed, including neutrophils, eosinophils<sup>39,55</sup>, and  
248 monocytes/macrophages. While the neutrophil-derived extracellular traps (NETs) have been

249 shown to have antimicrobial function, the release of chromatin webs from MKs may be an essential  
250 part of the immune and coagulation systems. It is also possible that MK-derived chromatin webs  
251 participate in disease processes, including ARDs and sepsis, when there are increased numbers of  
252 MKs within the pulmonary parenchyma<sup>53,66-67</sup>.

253

254 The participation of MKs in immune responses is important in the context of our finding of large  
255 numbers of MKs in the peripheral circulation and peripheral organs in patients with sepsis. These  
256 findings are consistent with previous reports showing that MKs numbers are increased in the  
257 peripheral circulation in neonates with sepsis, in the renal glomeruli of adults with sepsis, and in  
258 the lungs in patients with sepsis and acute respiratory distress syndrome (ARDS)<sup>70-71</sup>. While the  
259 clinical data presented in this study is suggestive of MKs playing a role in the pathophysiology of  
260 sepsis and sepsis-related complications, larger studies are required. One particular issue to be  
261 considered when studying the MKs in blood, is the requirement for special staining to identify and  
262 quantify MKs and the failure of automated hematology analyzers to identify the MKs<sup>68-70</sup> in blood  
263 Like lymphocytes, the average circulating MK diameter is between 10-15  $\mu\text{m}$  in diameter and they  
264 have scant cytoplasm. MKs identified in the lungs are larger in size than those in the peripheral  
265 venous circulation<sup>72-73</sup>. Additionally, staining with anti-CD162 antibodies is necessary for the  
266 detection of circulating large CD61<sup>+</sup>CD41<sup>+</sup>Draq5<sup>+</sup> cells. This is likely due to circulation of these  
267 cells in the form of 'clusters' with other peripheral blood cell types, such as neutrophils<sup>31,74-75</sup>.  
268 Further experiments will elucidate the participation of MK phagocytosis and chromatin web  
269 formation in pathology of infections and sepsis.

270

## 271 **MATERIALS AND METHODS**

### 272 **Cell culture**

273 Cord blood CD34<sup>+</sup> hematopoietic stem cells were purchased and cultured in StemSpan II media  
274 with the MK supplemental cytokines (StemSpan II, Stemcell Technologies, Inc.), according to the  
275 culture and differentiation protocols from Stemcell Technologies (Stemcell Technologies Inc.  
276 Cambridge, MA). A megakaryoblastic cell line (Meg-01) was purchased and cultured in RPMI  
277 with 10% FBS, according to the standard culture protocols from ATCC (American Type Culture  
278 Collection, Manassas, VA).

279

### 280 **Flow cytometry**

281 Flow cytometry was performed in order to verify appropriate cellular differentiation and for the  
282 evaluation of cell surface markers. Briefly, cells were stained with antibodies at a concentration of  
283 1:200 for 15 minutes, with the exception of CD41, which was at a concentration of 1:100. Cells  
284 were then stained with Draq5 (Thermo Fisher Scientific, Waltham, MA) at a concentration of  
285 1:10000 for 5 minutes. Antibodies included: anti-human CD41, HLA-ABC (MHC class I), HLA-  
286 DR (MHC class II), CD162 (p-glycoprotein-1; SELPG), CD61 (GPIIIa), CD41 (GPIIb), CD34  
287 (Biolegend, San Diego, Ca), CD66b, and CD62P (P-selectin) (BD Biosciences, San Jose, CA).  
288 Data was obtained through the Amnis ImageStreamX Mark II imaging flow cytometer and  
289 INSPIRE Software (EMD Millipore, Billerica, MA). The accompanying IDEAS Software was  
290 used to perform data analysis. Data is reported as the percent of the total cell population that stained  
291 positive for the specific marker.

292

### 293 **Bacterial conjugation to pHrodo for phagocytosis experiments**

294 Bacteria, including *Escherichia coli* (*E. coli*), *Staphylococcus aureus* (*S. aureus*), and  
295 *Streptococcus pyogenes* (*S. pyogenes*), were provided by the Division of Comparative Medicine  
296 at the Massachusetts Institute of Technology (Cambridge, MA). For the killed-bacteria  
297 experiments, organisms were heat killed at 75°C for 25 minutes. Bacteria were then conjugated to  
298 pHrodo succinimidyl ester dye (Thermo Fisher Scientific) according to the manufacturer's  
299 protocols. Briefly, bacteria were pelleted from cultures by centrifugations at 5100 rpm for 10  
300 minutes. Pellets were resuspended in PBS (pH 9.0) at a concentration of  $1 \times 10^8$  per mL. 200  $\mu$ L of  
301 this suspension was then added to 5  $\mu$ L of 10 mg/mL pHrodo succinimidyl ester dye and mixed  
302 thoroughly by pipetting. Bacteria were then stained for 30 mins in the dark with gentle shaking.  
303 Following staining, 1 mL of PBS (pH 8.0) was added to the solution, and bacteria were pelleted at  
304 13,400 rpm for 3 minutes in a benchtop centrifuge. The supernatant was removed and the pellet  
305 thoroughly resuspended in Tris Buffer (pH 8.5). The bacteria were then pelleted at 13,400 rpm for  
306 3 mins in a benchtop centrifuge, the supernatant was removed, and the bacteria were resuspended  
307 in 1 mL of PBS (pH 7.4) before they were stored at 4°C in the dark.

308

### 309 **Phagocytosis inhibition experiments**

310 *Beta-hemolytic E. coli* was provided by the Division of Comparative Medicine at the  
311 Massachusetts Institute of Technology (Cambridge, MA). Bacteria were heat-killed by incubation  
312 at 98°C for 30 mins. Unlabeled *Staphylococcus aureus* (Wood strain without protein A)  
313 BioParticles were purchased from Thermo Fisher Scientific. Bacteria and BioParticles were  
314 pelleted by centrifugations at 5100 rpm for 10 minutes at 4°C in a swing bucket centrifuge. Pellets  
315 were resuspended in PBS (pH 9.0) at a concentration of  $1 \times 10^8$  per mL. 200  $\mu$ L of this suspension  
316 was then added to 5  $\mu$ L of 10 mg/mL pHrodo Red succinimidyl ester dye +/- Alexa Fluor 488



317 succinimidyl ester dye (Life Technologies) and mixed thoroughly by pipetting. Bacteria were then  
318 stained for 30 mins in the dark with gentle shaking. Following staining, 1mL of PBS (pH 8.0) was  
319 added to the solution, and bacteria were pelleted at 13,400 rpm for 3 mins in a benchtop centrifuge.  
320 The supernatant was removed and the pellet was thoroughly resuspended in Tris Buffer (pH 8.5).  
321 Again, the bacteria were pelleted at 13,400 rpm for 3 mins in a benchtop centrifuge, the supernatant  
322 was removed, and the bacteria resuspended in 1 mL of PBS (pH 7.4).

323

324 Blood was collected in ACD Vacutainer tubes (BD, Becton, Dickinson and Company, Franklin  
325 Lakes, NJ). Neutrophils were isolated from whole blood using a negative-selection protocol.  
326 Briefly, neutrophils were isolated using a density gradient with HetaSep (STEMCELL  
327 Technologies Inc. Vancouver, Canada) and then purified with EasySep Human Neutrophil Kit  
328 (STEMCELL Technologies Inc. Vancouver, Canada), following manufacturers protocol.  
329 Neutrophil purity was assessed to be >98% and cell count was performed using a hemocytometer.  
330 Neutrophils were subsequently re-suspended in the same media as the Meg-01 cells (RPMI + 10%  
331 FBS).

332

333 Meg01 and isolated neutrophils were incubated with 10 µg/mL Cytochalasin B from Dreschlara  
334 dematodia (C6762; Sigma-Aldrich) or DMSO for 30 mins prior to addition of bacteria. Cells were  
335 incubated for 2 hours with heat-killed bacteria co-labelled with pHrodo Red and Alex Fluor 488  
336 to measure phagocytosis. 10 µL of cells were then imaged on a disposable C-Chip hemocytometer  
337 (In Cyto, SKC, Inc. C-Chip) using a 10X and 20X objective on a Nikon TiE fluorescent  
338 microscope. Stitched 6 x 6 field of view large images were de-identified and 100 cells scored blind  
339 for red fluorescence for the positive indication of pHrodo internalization and acidification. The

340 following conditions were included in the experimental design and analysis: cells (negative  
341 control), cells with unstained bacteria (control), cells with CCB (control), cells with stained  
342 bacteria (experimental), cells with stained bacteria and CCB (experimental). No nucleated cells  
343 were noted to have a red fluorescent cytoplasm when not co-incubated with the stained bacteria.  
344 There was also no increase in the number of nucleated cells with red cytoplasm in the conditions  
345 only treated with CCB.

346

### 347 **Immunofluorescence Imaging**

348 Cells were co-incubated with either the pHrodo-conjugated bacteria, Zymosan A *S. cerevisiae*  
349 BioParticles (ThermoFisher Scientific), for 60 minutes or overnight at 37°C on poly-lysine coated  
350 slides (Sigma Aldrich, St Louis, MO, USA). The slides were then rinsed gently three times with  
351 PBS and the adhered cells were subsequently stained for live imaging or fixed and then stained.  
352 For evaluation of live cells, cells were stained with Hoechst (Thermo Fisher Scientific) at a  
353 concentration of 1:2000 for 5 minutes. For the calcein green-stained cells, cells were also stained  
354 with calcein (Thermo Fisher Scientific) at 1:1000 for 5 minutes. For chromatin web evaluation,  
355 cells were also stained with SYTOX orange (Thermo Fisher Scientific) at 1:50 for 5 minutes. For  
356 histone staining of extracellular contents, cells co-incubated with *E. coli* LPS for 60 minutes at  
357 37°C. They were then fixed with 4% paraformaldehyde (Santa Cruz Biotechnology, Dallas, TX,  
358 USA) for 30 minutes and then concentrated onto a poly-lysine coated slide using the Cytospin 4  
359 cytocentrifuge (Thermo Fisher Scientific), for 5 minutes at 1250 rpm, rinsed once with di-water  
360 and stored at -80°C until staining and evaluation. For staining, the slides were thawed at room  
361 temperature and blocked with 5% donkey serum (Jackson Immunoresearch) for 2 hours. The slides  
362 were rinsed three times with PBS and then treated with the following primary antibodies for three

363 hours: mouse anti-human neutrophil elastase (NE; ELA2) antibody (950334, Novus Biologicals,  
364 Littleton, CO, USA) at 1:300, rat anti-Histone H3 (phospho S28) antibody (HTA28, Abcam,  
365 Cambridge, MA, USA) at 1:500, and rabbit anti-human myeloperoxidase (A039829-2, Dako,  
366 USA) at 1:300. The slides were then rinsed three times with PBS and incubated with secondary  
367 antibodies, including donkey anti-rabbit 488, donkey anti-rat 647, and donkey anti-mouse 568  
368 (Life Technologies) at 1:500 for 30 minutes. Slides were then rinsed three times with PBS and  
369 then covered with Vectashield antifade mounting medium with DAPI (Vector Labs, Burlingame,  
370 Ca, USA). The cells were then images with one of two fluorescent microscopes: Life Technologies  
371 EVOS FL (Thermo Fisher Scientific) or Nikon Eclipse 90i microscope (Nikon Instruments Inc.,  
372 Melville, NY). Composites and videos were made and images were analyzed using either Fiji or  
373 GIMP software.

374

### 375 **Chromatin web release**

376 Meg-01 and CB MK cells underwent various treatments to induce the formation of chromatin webs  
377 from MK cells. Meg-01 cells were co-incubated with various pathogenic stimuli, including *E. coli*  
378 LPS and live pHrodo conjugated *E. coli*, for 30-60 minutes at 37°C on a polylysine-coated slide.  
379 The poly-lysine slide was outlined with a hydrophobic pen prior to the experiment to set a  
380 boundary for the liquid. The slide was then rinsed three times in PBS. The slides were stained with  
381 1:1000 Hoechst and 1:500 SYTOX orange and cover slipped. For the GFP-H2B experiments,  
382 Meg-01 cells were transfected with CellLight Histone 2B-GFP (Bacmam 2.0, ThermoFisher  
383 Scientific) for 48-72 hours and then labeled with MitoSox Red mitochondrial superoxide indicator  
384 (ThermoFisher Scientific) and Hoechst. Unstained slides were stored and evaluated with  
385 immunofluorescence techniques, as described above. The cells were imaged using one of two

386 fluorescent microscopes: Life Technologies EVOS FL (Thermo Fisher Scientific) or Nikon  
387 Eclipse 90i microscope (Nikon Instruments Inc., Melville, NY).

388

### 389 **Double stranded-DNA (ds-DNA) quantification**

390 Meg-01 cells, at  $3 \times 10^5$  per mL, were co-incubated with various concentrations of *E. coli* LPS  
391 (20 pg/mL to 2 ug/mL) for 30 minutes at 37°C. The cells were then pelleted down at 1900 g for 10  
392 minutes and the supernatant was immediately stored at -80oc. The experiment was performed in  
393 biological triplicates (cells from 3 different culture flasks) and in technical triplicates, on two  
394 different days. Double stranded DNA (dsDNA) was quantified using the Quant-iT™ PicoGreen™  
395 dsDNA Assay Kit (Thermo Fisher Scientific) following the recommended protocol. Briefly, the  
396 supernatant samples were thawed and 50 uL was placed in a 96-well plate, followed by 50 uL of  
397 the aqueous working solution. A standard curve was created for a reference of extracellular  
398 chromatin. The plate was incubated at room temperature for 5 minutes and then read at standard  
399 fluorescein wavelengths (excitation ~480 nm, emission ~520 nm) on a SpectraMax Gemini XS  
400 plate reader (Molecular Devices, Sunnyvale, CA, USA). The mean fluorescent intensities (MFIs)  
401 were then converted to free dsDNA concentration according to the standard curve.

402

### 403 **Transmission Electron Microscopy**

404 Meg-01 cells were co-incubated with live bacteria for 1 hour at 37°C. The cells were then pelleted  
405 down at 1900 g for 10 minutes. Immediately after removal of the culture medium, KII fixative  
406 (2.5% glutaraldehyde, 2.0% paraformaldehyde, 0.025 % Calcium Chloride in a 0.1M Sodium  
407 Cacodylate buffer, pH 7.4) was added to the cell/bacteria pellet, mixed, and allowed to fix for 20  
408 minutes. The fixed sample was then prepared for both transmission electron microscopy and thin-

409 section light microscopy and were subsequently imaged. Briefly, a rubber tipped cell scraper was  
410 used to gently remove the fixed monolayer from the plastic substrate. The samples were  
411 centrifuged, the fixative removed, replaced with buffer, and stored at 4°C until further processing.  
412 To make a cell block, the material was centrifuged again and resuspended in warm 2% agar in a  
413 warm water bath to keep the agar fluid. The material was then centrifuged again and the agar  
414 allowed to gel in an ice water bath. The tissue containing tip of the centrifuge tube was cut off  
415 resulting in an agar block with the material embedded within it. This agar block was then processed  
416 routinely for electron microscopy in a Leica Lynx™ automatic tissue processor. Subsequent  
417 processing was done using a Leica Lynx™ automatic tissue processor. Briefly, they were post-  
418 fixed in osmium tetroxide, stained En Bloc with uranyl acetate, dehydrated in graded ethanol  
419 solutions, infiltrated with propylene oxide/Epon mixtures, embedded in pure Epon, and  
420 polymerized overnight at 60°C. One-micron sections were cut, stained with toluidine blue, and  
421 examined by light microscopy. Representative areas were chosen for electron microscopic study  
422 and the Epon blocks were trimmed accordingly. Thin sections were cut with an LKB 8801  
423 ultramicrotome and diamond knife, stained with lead citrate, and examined in a FEI Morgagni  
424 transmission electron microscope. Images were captured with an AMT (Advanced Microscopy  
425 Techniques) 2K digital camera.

426

#### 427 **Transwell migration assay**

428 Growth factor reduced (GFR) matrigel coated transwell inserts with 8 um pores (Biocoat Matrigel  
429 Invasion Chambers, Corning, New Jersey, USA) were thawed for 30 minutes at 37°C. 1 million  
430 Meg-01 cells were loaded in a total volume of 200 µL of RPMI with 10% FBS in the top chamber,  
431 while the bottom chamber was loaded with 600 µL of various conditions, including: RPMI with

432 10% FBS (negative control), 200 ng/mL SDF1- $\alpha$  (CXCL12, Peprotech, New Jersey, USA)  
433 (positive control), 220 pg/mL and 2.2 ng/mL *E. coli* LPS, Zymosan particles alone, and zymosan  
434 particles with 220 ng/mL *E. coli* LPS or with 200 ng/mL SDF1- $\alpha$ . The wells were incubated for  
435 24 hrs. at 37°C. The cells that migrated through the transwell insert into the bottom chamber  
436 were counted using Cellometer Vision automated cell counter (Niexcelom, Bioscience LLC.,  
437 Lawrence, MA, USA).

438

### 439 **Microfluidic device fabrication**

440 The microfluidic devices were manufactured using standard microfabrication techniques. The  
441 microfluidic device was designed to allow the formation of a chemical gradient in two steps, as  
442 previously described (Caroline JN, 2014). Briefly, a two-layer photoresist design (SU8,  
443 Microchem, Newton, MA), with a first and second layer that were 10.5 and 50  $\mu\text{m}$  thick, were  
444 patterned on one silicon wafer via sequential photolithography masks and processing cycles  
445 according to the manufacturer's protocols. The resulting patterned wafer was then used as a mold  
446 to produce PDMS (Polymidemethylsiloxane, Fished Scientific, Fair Lawn, NJ) devices, which  
447 were subsequently irreversibly bonded to glass slides (1x3 inches, Fisher). First, an array of  
448 circular wells (200  $\mu\text{m}$  diameter, 57  $\mu\text{m}$  height), connected to a side channel (10  $\mu\text{m}$  width, 10.5  
449  $\mu\text{m}$  height) by orthogonal side-combs (4.5  $\mu\text{m}$  width, 10.5  $\mu\text{m}$  height) were primed with the  
450 following conditions: RPMI with 10% FBS (negative control), 200 ng/mL SDF1- $\alpha$  (CXCL12,  
451 Peprotech, New Jersey, USA) (positive control), 22 pg/mL, 220 pg/mL and 2.2 ng/mL *E. coli* LPS,  
452 zymosan particles, zymosan particles (1 million/mL) with 220 ng/mL *E. coli* LPS and zymosan  
453 particles (1 million/mL) with 200 ng/mL SDF1- $\alpha$ . 200  $\mu\text{L}$  RPMI +10% FBS was used to wash the  
454 main channel. The diffusion of the chemoattractant from the circular wells, serving as sources, to

455 the central channel, serving as the sink, produced the guiding gradient for the cells in the central  
456 channels. After the devices were primed and loaded, the chip was placed under vacuum for 10  
457 minutes. Cells were then stained, loaded, and imaged for 18 hrs. every 10 minutes using time-lapse  
458 imaging on a fully automated Nikon TiE microscope with the biochamber at 37°C and 80%  
459 humidity, and in the presence of 5% carbon dioxide gas. Images were acquired automatically from  
460 distinct locations on each microfluidic device, with each image including a minimum of 3 circular  
461 wells. A minimum of 18 wells per condition were analyzed. Fiji manual tracking software (NIH)  
462 was used for the analysis of MK and platelet migration and behavior.

463

#### 464 **MK quantification in patient blood samples**

465 Venous blood from patients diagnosed with sepsis was collected and evaluated for circulating MKs  
466 (IRB protocol numbers, MGH No: 2014P002087; MIT No:150100681R001). A patient was  
467 categorized as septic when one of the diagnoses for the patient was ‘sepsis’ and when there was a  
468 confirmed infection, which could consist of bacterial infection, fungal infection, viral infection, or  
469 a combination thereof. Control samples were healthy donors. ‘Complicated’ sepsis was defined as  
470 the clinician-diagnosed development of acute kidney injury (AKI) or acute respiratory distress  
471 syndrome (ARDS) as documented in the patient’s medical records. Twenty-one samples were  
472 evaluated with 13 sepsis samples (age 34-75 yrs., 4 females, 9 males) and 5 control samples (age  
473 25-50 yrs., 3 females, 1 male) (Table S1 and S2). Three of the sepsis samples (1 female and 2  
474 males) had follow-up blood evaluation 3 days after initial blood analysis.

475

476 Cell surface markers were selected to determine cell type by differential marker expression.  
477 CD162 antibody was utilized to break up any platelet-leukocyte aggregates prior to analyzing the

478 samples.<sup>31</sup> White blood cell concentration was used as an internal control for the quantification  
479 method and whole blood spiked with MKs was used to validate surface marker identification of  
480 MKs in samples (Figure S1). Cell surface markers were selected to determine cell type by  
481 differential marker expression: CD41 (glycoprotein IIb; GPIIb) and CD61 (glycoprotein IIIb;  
482 GPIIIb) are found on the cell surface of platelets and MKs, where they form a GPIIb/IIIa complex  
483 and bind to fibrinogen and von Willebrand Factor (vWF) during platelet activation. CD45 (protein  
484 tyrosine phosphatase, receptor type, C; PTPRC; leukocyte common antigen; LCA) and CD162 (P-  
485 selectin glycoprotein ligand-1; PSGL1; SELPLG) are both present on leukocytes where CD45 hi  
486 and lo populations can be used to identify both neutrophils and lymphocytes. Draq5 is a nuclear  
487 marker that was used to differentiate between CD41<sup>+</sup>CD61<sup>+</sup> anuclear platelets and nucleated MKs.  
488

489 First, white blood cells were identified and quantified and were then compared to the total white  
490 blood cell count in the complete blood cell count (CBC) that was performed on the same blood  
491 sample at the Massachusetts General Hospital clinical pathology lab as part of the patient's routine  
492 diagnostics in order to verify our concentration calculation methods (Figure S1A-C). Once white  
493 blood cell count was verified, cellular events staining positive for MK markers were then collected  
494 and quantified. The concentrations of MKs and leukocytes in the patient samples were then back-  
495 calculated, taking into account the total volume of sample analyzed and the initial 1:200 dilution  
496 of the blood.

497  
498 In order to quantify circulating MKs in peripheral venous samples, we performed quantitative  
499 imaging flow cytometry on whole blood. In this set of experiments, we used the quantification of  
500 leukocytes in the blood as an internal methods control, with the quantity of leukocytes being



501 compared to the automated CBC analyzer total white blood cell count to validate the cell  
502 concentration calculations. Blood collected in EDTA vacutainer tubes was diluted 1:200 in  
503 calcium-free hepes-tyrode buffer (Boston Scientific, Boston, MA, USA) with 20% volume of acid  
504 citrate dextrose (ACD, Boston Scientific). The diluted blood was then stained with CD41 PacBlue,  
505 CD61 FITC, CD45 CY5/594, and CD162 PE at 1:100-1:200 for 20 minute, and 1:1000 Draq5 for  
506 5 minutes. The samples were then run using the Amnis flow cytometer and the data was analyzed  
507 with IDEAS software. MKs were defined as CD41<sup>+</sup>CD61<sup>+</sup>Draq5<sup>+</sup> cells. Leukocytes were defined  
508 as CD162<sup>+</sup>CD45<sup>+</sup>Draq5<sup>+</sup> cells. The concentrations of MKs and leukocytes in the patient samples  
509 were then back-calculated, taking into account the total volume of sample analyzed by Amnis and  
510 the initial 1:200 dilution of the blood (Equation 1).

511

512 **Equation 1:** (Cell count (# cells) / Total volume analyzed (uL)) x (dilution factor; 33.3) x (1000 uL/mL) = # MK/mL

513

514 In order to explore the ability of the automated CBC analyzer to count and identify MKs, venous  
515 blood collected in EDTA was spiked with various concentrations of Meg-01 cells or cord-blood  
516 derived MKs (day 14 of differentiation). Pure MKs and the spiked whole blood samples were  
517 analyzed with flow cytometry, as described above and also run on the automated CBC analyzer in  
518 order to determine whether an automated analyzer is able to detect the presence of MKs and to see  
519 what type of cell they are categorizes as. Pure MKs were counted manually with a hemocytometer  
520 to compare with the automated analyzer (Figure S1D-E). While the imaging flow cytometer was  
521 able to specifically identify cells as MKs, the automated CBC analyzer was unable to identify  
522 them.

523

524 **Pathology samples**

525 Histopathology samples from patients that underwent autopsies were retrospectively collected and  
526 evaluated. All samples and patient information were collected and handled according to MGH and  
527 Massachusetts Institute of Technology (Cambridge, MA, USA) IRB protocol (MGH No:  
528 2014P002087; MIT No:150100681R001). A patient was categorized as septic when the cause of  
529 death was determined to be sepsis by the official pathology report. Control patients were defined  
530 as having primary cardiac disease as the cause of death. Fifteen samples were evaluated with 9  
531 sepsis samples (age 60-90 yrs., 2 females, 3 males) and 5 control samples (age 68-87 yrs., 7  
532 females, 2 males) (Table S3). All histopathology slides were de-identified and analyzed blindly.

533

534 Paraffin embedded tissue samples, including kidney, and the right middle lung lobe were sectioned  
535 and stained with either Hematoxylin & Eosin (H&E), gram stain, or with HRP-labeled CD61  
536 antibodies by the Division of Comparative Medicine (MIT, Cambridge, MA, USA) and the  
537 Massachusetts General Hospital (Boston, MA, USA), respectively. The percent of CD61 staining  
538 per renal glomerulus was quantified using ImageJ software (NIH). Twenty renal glomeruli were  
539 evaluated for each patient. For evaluation of the lungs, the number of MKs were counted in ten  
540 40x magnification views of the right middle lung lobe for each patient.

541

#### 542 **Statistical Analysis**

543 Statistics were performed using both Microsoft Excel and GraphPad Prism Software (GraphPad  
544 Software, Inc.). Either one-way ANOVA or student t-tests were performed to compare between  
545 conditions. A p-value of <0.05 was considered significant.

546 **Competing financial interest:**

547 The authors declare that they have no competing interests.

548

549 **Acknowledgements:**

550 The authors would like to thank Carolyn Madden at the Division of Comparative Medicine (MIT)  
551 for her isolation and preparation of the bacterial cultures used in this paper.

552

553 **Funding:** This work was supported by grants from the National Institutes of Health: GM092804  
554 and AG051082 to DI, and T32-OD010978 and P30ES002109 to JGF, and P50GM021700 to RGT.

555

556 **Authorship Contributions:**

557 G.H.F developed the hypothesis, designed and performed experiments, and wrote the manuscript.  
558 F.E provided guidance on bacterial phagocytosis experiments and chemotaxis assays, performed  
559 phagocytosis assays and contributed to manuscript preparation. L.Z. provided guidance and  
560 pathology review of the sepsis samples, contributed to manuscript preparation. M.S. Performed  
561 electron microscopy, contributed to manuscript preparation. J.J. and A.L.M maintained cell  
562 cultures and performed chemotaxis and phagocytosis experiments and data analysis. K.W.  
563 provided guidance on immunofluorescence experiments and contributed to manuscript  
564 preparation. D.O. performed automated image analysis on the kidney pathology samples. C.V.,  
565 D.I., J.G.F., and R.G.T designed experiments, analyzed the findings, and prepared the manuscript.

566

567 **References**

- 568 1) Kaushansky K. The molecular mechanisms that control thrombopoiesis. *J Clin Invest.* **115**,  
569 3339–3347 (2005).
- 570 2) Machlus KR, Italiano JE. The incredible journey: From megakaryocyte development to platelet  
571 formation. *J Cell Biol*, **201**, 785-796 (2013).
- 572 3) Alamo IG, Kannan KB, Loftus TJ, et al. Severe trauma and chronic stress activates  
573 extramedullary erythropoiesis. *J Trauma Acute Care Surg*, **83**, 144-150 (2017).
- 574 4) Lefrancais E, Ortiz-Munoz G, Caudrillier E, et al. The lung is a site of platelet biogenesis and  
575 a reservoir for haematopoietic progenitors. *Nature*, **544**, 105-109 (2017).
- 576 5) Yacoub A, Brockman A. Extramedullary hematopoiesis and splenic vein thrombosis, a unique  
577 presentation of pre-clinical essential thrombocythemia. *Blood*, **122**, 5257 (2013).
- 578 6) Yassin MA, Nashwan A, Mohamed S. Extramedullary hematopoiesis in patient with primary  
579 myelofibrosis rare and serious complications. *Blood*, **128**, 5490 (2016).
- 580 7) Hill AD, Swanson PE. Myocardial extramedullary hematopoiesis: A clinicopathologic study.  
581 *Mod Pathol*,**13**, 779-787 (2000).
- 582 8) Weyrich AS, Zimmerman GA. Platelets in lung biology. *Annu. Rev. Physiol.*, **75**, 569-591,  
583 (2013).
- 584 9) Mandal RV, Mark EJ, Kradin RL. Megakaryocytes and platelet homeostasis in diffuse alveolar  
585 damage. *Exp Mol Pathol.*, **83**, 327-31 (2007).
- 586 10) Yadav H, Kor DJ. Platelets in the pathogenesis of acute respiratory distress syndrome. *Am J*  
587 *Physiol Lung Cell Mol Physiol.*, **309**, L915-L923 (2015).
- 588 11) Sharma GK, Tablot IC. Pulmonary megakaryocytes: “missing link” between cardiovascular  
589 and respiratory disease? *J Clin Pathol*, **39**, 969-976 (1986).

- 590 12) Kaufman RM, Airo R, Pollack S, et al. Origin of pulmonary megakaryocytes. *Blood*, **25**, 767-  
591 775 (1965).
- 592 13) Finkielsztein A, Schlinker AC, Zhang L, et al. Human megakaryocyte progenitors derived  
593 from hematopoietic stem cells of normal individuals are MHC class II-expressing professional  
594 APC that enhance Th17 and Th1/Th17 responses. *Immunol Lett.*, **163**, 84-95 (2015).
- 595 14) Undi RB, Sarvothaman S, Narasaiah K, et al. Toll-like receptor 2 signalling: Significance in  
596 megakaryocyte development through wnt signaling cross-talk and cytokine induction.  
597 *Cytokine*, **83**, 245-249 (2016).
- 598 15) D'Atri LP, Etulain J, Rivadeneyra L, et al. Expression and functionality of toll-like receptor 3  
599 in megakaryocytic lineage. *J Thromb Haemost.*, **13**, 839-850 (2015).
- 600 16) Beaulieu LM, Freedman JE. The role of inflammation in regulating platelet production and  
601 function: Toll-like receptors in platelets and megakaryocytes. *Thromb Res.*, **125**, 205-209  
602 (2010).
- 603 17) Shiraki R, Inoue N, Kawasaki S, et al. Expression of Toll-like receptors on human platelets.  
604 *Thromb Res.*, **113**, 379-85 (2004).
- 605 18) Beulieu LM, Lin E, Morin KM, et al. Regulatory effects of TLR2 on megakaryocytic cell  
606 function. *Blood*, **117**, 5963-5974 (2011).
- 607 19) Cunin P, Nigrovic PA. Megakaryocytes as immune cells. *J Leuk Biol*, **105**, 1111-1121 (2019).
- 608 20) Bentfeld-Barker ME, Bainton DF. Identification of primary lysosomes in human  
609 megakaryocytes and platelets. *Blood*, **59**, 472-81 (1982).
- 610 21) Kang HP, Chiang MY, Ecklund D, et al. Megakaryocyte progenitors are the main antigen  
611 presenting cells inducing Th17 response to lupus autoantigens and foreign antigens. *J*  
612 *Immunol.*, **188**, 5970-5980 (2012).

- 613 22) Nagasawa T, Nakayasu C, Rieger AM, et al. Phagocytosis by thrombocytes is a conserved  
614 innate immune mechanism in lower vertebrates. *Front Immunol.*, **5**, 445 (2014).
- 615 23) White JG. Platelet are covercytes, not phagocytes: uptake of bacteria involves channels of the  
616 open canalicular system. *Platelets*, **16**, 121-31 (2005).
- 617 24) Lewis JC, Maldonado JE, Mann KG. Phagocytosis in human platelets: localization of acid  
618 phosphatase-positive phagosomes following latex uptake. *Blood*, **47**, 833-840 (1976).
- 619 25) Absolom DR, Francis DW, Zingg W, et al. Phagocytosis of bacteria by platelets: surface  
620 thermodynamics. *J of Colloidal and Interface Science*, **85**, 168-177 (1982).
- 621 26) Zucker-Franklin S, Cao Y. Megakaryocytes of human immunodeficiency virus-infected  
622 individuals express viral RNA. *Proc. Natl. Acad. Sci. USA*, **86**, 5595-5599 (1989).
- 623 27) Ferry JA, Petit CK, Rosenberg AE, et al. Fungi in megakaryocytes: an unusual manifestation  
624 of fungal infection in bone marrow. *Am J Clin Pathol*, **96**, 577-81, (1991).
- 625 28) Clark KB, Hsiao HM, Bassit L, et al. Characterization of dengue virus 2 growth in  
626 megakaryocyte-erythrocyte progenitor cells. *Virology*, **493**, 162-172 (2016).
- 627 29) Clark KB, Noisakran S, Onlamoon N, et al. Multiploid CD61+ cells are the pre-dominant cell  
628 lineage infected during acute dengue virus infection in bone marrow. *PLOS one*, **7**, e52902  
629 (2012).
- 630 30) Schindelin, J, Arganda-Carreras I, Frise E, et al. Fiji: an open-source platform for biological-  
631 image analysis, *Nature methods*, **9**, 676-682 (2012).
- 632 31) Frydman GH, Le A, Ellett F, et al. Technical advance: changes in neutrophil migration patterns  
633 upon contact with platelets in a microfluidic assay. *J Leukoc Biol.*, **101**, 797-806 (2017).

- 634 32) Saeki K, Yagisawa M, Kitagawa S, You A. Diverse effects of cytochalasin B on priming and  
635 triggering the respiratory burst activity in human neutrophils and monocytes. *Int J Hematol*,  
636 **74**, 409-15 (2001).
- 637 33) Kim MY, Kim JH, Cho JY. Cytochalasin B modulates macrophage mediated inflammatory  
638 responses. *Biomol Ther (Seoul)*, **22**, 295-300 (2014).
- 639 34) Diaz-Ricart M, Arderiu G, Estebanell E, et al. Inhibition of cytoskeletal assembly by  
640 cytochalasin B prevents signaling through tyrosine phosphorylation and secretion triggered by  
641 collagen but not by thrombin. *Am J Pathol*, **160**, 329-337 (2002).
- 642 35) Hamada T, Mohle R, Hesselgesser J, et al. Transendothelial migration of megakaryocytes in  
643 response to stromal cell-derived factor 1 (SDF-1) enhances platelet formation. *J Exp Med*, **188**,  
644 539-548 (1998).
- 645 36) Yipp BG, Kubes P. NETosis: how vital is it? *Blood*, **122**, 2784-2794 (2013).
- 646 37) Floyd M, Winn M, Cullen C, et al. Swimming motility mediates the formation of neutrophil  
647 extracellular traps induced by flagellated *Pseudomonas aeruginosa*. *PLoS Pathog*, **12**,  
648 e1005987 (2016).
- 649 38) Pilszczek FH, Salina D, Poon KKH, et al. A novel mechanism of rapid nuclear neutrophil  
650 extracellular trap formation in response to *Staphylococcus aureus*. *J Immunol*, **185**, 7413-7425  
651 (2010).
- 652 39) Ueki S, Melo RCN, Ghiran I, et al. Eosinophil extracellular DNA trap cell death mediates lytic  
653 release of free secretion-competent eosinophil granules in humans. *Blood*, **121**, 2074-2083  
654 (2013).
- 655 40) Sperling C, Fischer M, Maitz MF, et al. Neutrophil extracellular trap formation upon exposure  
656 of hydrophobic materials to human whole blood causes thrombogenic reactions. *Biomater Sci.*,

- 657        **5**, 1998-2008 (2017).
- 658    41) Semple JW, Italiano JE, Freedman J. Platelet and the immune continuum. *Nature Reviews*  
659        *Immunol.*, **11**, 264-274 (2011).
- 660    42) Morrell CN, Aggrey AA, Chapman LM, et al. Emerging roles for platelets as immune and  
661        inflammatory cells. *Blood*, **123**, 2759-2767 (2014).
- 662    43) de Stoppelaar SF, van 't Veer C, van der Poll T. The role of platelets in sepsis. *Thromb*  
663        *Haemost.*, **112**, 666-677 (2014).
- 664    44) Prosser A, Hibbert J, Strunk T, et al. Phagocytosis of neonatal pathogens by peripheral blood  
665        neutrophils and monocytes from newborn preterm and term infants. *Pediatric Research*, **74**,  
666        503-510 (2013).
- 667    45) Naqvi AR, Fordham JB, Nares S. miR-24, miR-30b, and miR-142-3p regulate phagocytosis in  
668        myeloid inflammatory cells. *J Immunol.*, **194**, 1916-1927 (2015).
- 669    46) Kolb-Maurer A, Wilhelm M, Weissinger F, et al. Interaction of human hematopoietic stem  
670        cells with bacterial pathogens. *Blood*, **100**, 3703-3709 (2002).
- 671    47) Zuchtriegel G, Uhl B, Pühr-Westerheide D, et al. Platelets guide leukocytes to their sites of  
672        extravasation. *PLOS Biol.*, **14**, e1002459 (2016).
- 673    48) Haemmerle M, Bottsford-Miller J, Pradeep S, et al. FAK regulates platelet extravasation and  
674        tumor growth after antiangiogenic therapy withdrawal. *J Clin Invest.*, **126**, 1885-1896 (2016).
- 675    49) Lisman T, Porte RJ. The role of platelets in liver inflammation and regeneration. *Semin Thromb*  
676        *Hemost.*, **36**, 170-174 (2010).
- 677    50) Singer G, Urakami H, Specian RD, et al. Platelet recruitment in the murine hepatic  
678        microvasculature during experimental sepsis: role of neutrophils. *Microcirculation*, **13**, 89-97  
679        (2006).



- 680 51) Croner RS, Hoerer E, Kulu Y, et al. Hepatic platelet and leukocyte adherence during  
681 endotoxemia. *Crit Care*, **10**, R15 (2006).
- 682 52) Stokes KY, Granger DN. Platelets: a critical link between inflammation and microvascular  
683 dysfunction. *J Physiol*, **590**, 1023-1034 (2012).
- 684 53) Wells S, Sissons M, Hasleton PS. Quantitation of pulmonary megakaryocytes and fibrin  
685 thrombi in patients dying from burns. *Histopathology*, **8**, 517-527 (1984).
- 686 54) Aabo K, Hansen KB. Megakaryocyte in pulmonary blood vessels: Incidence at autopsy,  
687 clinicopathological relations especially to disseminated intravascular coagulation. *Acta*  
688 *Pathologica, Microbiologica et Immunologica Scandinavica*, **1**, 285-291 (1978).
- 689 55) Fuchs TA, Abed U, Goosman C, et al. Novel cell death program leads to neutrophil  
690 extracellular traps. *JCB*, **176**, 231-241 (2007).
- 691 56) Papayannopoulos V. Neutrophil extracellular traps in immunity and disease. *Nature Reviews*  
692 *Immunology*, **18**, 134-137 (2018).
- 693 57) Echevarria LU, Leimgruber C, Gonzalez JG, et al. Evidence of eosinophil extracellular trap  
694 cell death in COPD: does it represent the trigger that switches on the disease? *Int J Chron*  
695 *Obstruct Pulmon Dis*, **12**, 885-896 (2017).
- 696 58) Dworksi R, Simon HU, Hoskins A, et al. Eosinophil and neutrophil extracellular DNA traps  
697 in human allergic asthmatic airways. *J Allergy Clin Immunol*, **127**, 1260-1266 (2011).
- 698 59) Narasaraju T, Yang E, Samy RP, et al. Excessive neutrophils and neutrophil extracellular traps  
699 contribute to acute lung injury of influenza pneumonitis. *AJP*, **179**, 199-210 (2011).
- 700 60) L X, Wen T, Song J, et al. Extracellular histones are clinically relevant mediators in the  
701 pathogenesis of acute respiratory distress syndrome. *Respir Res*, **18**, 165, (2017).
- 702 61) Xu Z, Huang Y, Mao P, et al. Sepsis and ARDS: the dark side of histones. *Mediators Inflamm*,

- 703       **2015**, 205054 (2015).
- 704   62) Jansen MPB, Emal D, Teske GJD, et al. Release of extracellular DNA influences renal  
705       ischemia reperfusion injury by platelet activation and formation of neutrophil extracellular  
706       traps. *Kidney Int*, **91**, 352-364 (2017).
- 707   63) Xu J, Zhang X, Pelayo R, et al. Extracellular histones are major mediators of death in sepsis.  
708       *Nat Med.*, **15**, 1318-1321 (2009).
- 709   64) Maeda A, Fadeel B. Mitochondria released by cells undergoing TNF- $\alpha$ -induced necroptosis  
710       act as danger signals. *Cell Death and Disease*, **5**, e1312 (2014).
- 711   65) Boudreau LH, Duchez AC, Cloutier N, et al. Platelets release mitochondria serving as substrate  
712       for bactericidal group IIA-secreted phospholipase A<sub>2</sub> to promote inflammation. *Blood*, **124**,  
713       2173-2183 (2014).
- 714   66) Sulkowski S, Terlikowski S, Sulkowski M. Occlusion of pulmonary vessels by  
715       megakaryocytes after treatment with tumour necrosis factor-alpha (TNF- $\alpha$ ). *J Comp Pathol.*,  
716       **120**, 235-245 (1999).
- 717   67) Kadas L, Szell K. The role of megakaryocytes and tissue mast cells in the respiratory distress  
718       syndrome of adults. *Acta Morphol Acad Sci Hung*, **29**, 395-404 (1981).
- 719   68) Sanford D, Hsia C. Value of the peripheral blood film: megakaryocytic fragments  
720       misidentified by automated counter. *Blood*, **122**, 4163 (2013).
- 721   69) Erber WN, Jacobs A, Oscier DG, et al. Circulating micromegakaryocytes in myelodysplasia.  
722       *J Clin Pathol*, **40**, 1349-1352 (1987).
- 723   70) Brown RE, Rimsza LM, Pastos K, et al. Effects of sepsis on neonatal thrombopoiesis. *Pediatric*  
724       *Research*, **64**, 399-404 (2008).
- 725   71) Broghamer WL Jr, Weakley-Jones B. Megakaryocytes in renal glomeruli. *AJCP*, **76**, 178-182

- 726 (1981).
- 727 72) Scheinin TM, Koivuniemi AP. Megakaryocytes in the pulmonary circulation. *Blood*, **22**, 82-  
728 87 (1963).
- 729 73) Pederson NT. Occurrence of megakaryocytes in various vessels and their retention in the  
730 pulmonary capillaries in man. *Scand J Haematol.*, **21**, 369-375 (1978).
- 731 74) Wang X, Qin E, Sun B. New strategy for sepsis: targeting a key role of the platelet-neutrophil  
732 interaction. *Burns Trauma*, **2**, 114-120 (2014).
- 733 75) Asaduzzaman M, Rahman M, Jeppsson B, et al. P-selectin glycoprotein-ligand-1 regulates  
734 pulmonary recruitment of neutrophils in a platelet-independent manner in abdominal sepsis.  
735 *Br J Pharmacol.*, **156**, 307-315 (2009).
- 736

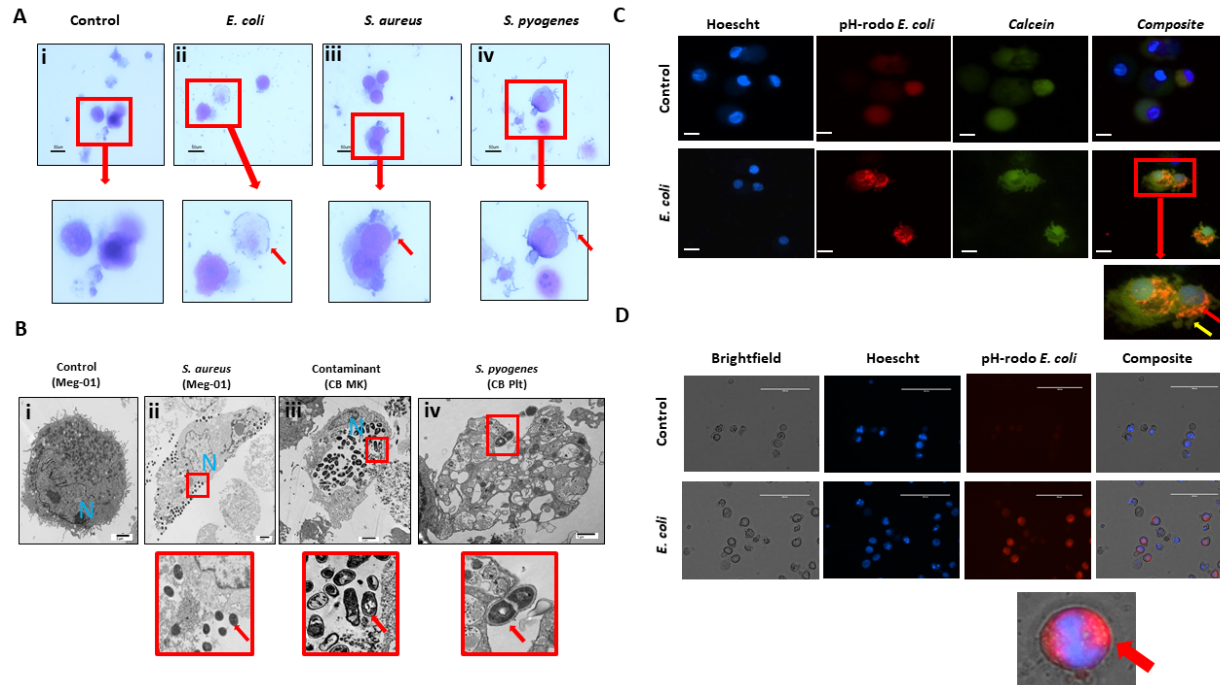

737

738 **Figure 1. MKs are capable of phagocytosis of pathogens.** (A) Meg-01 cells were co-incubated  
739 with *E. coli*, *S. aureus*, and *S. pyogenes*. Light microscopy with diff-quick staining shows that  
740 bacteria are associated with the cytoplasm and cell membrane of the cells. (B) Transmission  
741 electron microscopy of both Meg-01 and CB MKs exhibiting bacterial association with the cell  
742 membrane as well as internalization into vacuoles within the cytoplasm. Panel i is a control Meg-  
743 01 cell, while panel ii is a Meg-01 cell that was co-incubated with live *S. aureus*. Panel ii shows a  
744 CB MK with multiple bacteria within a large cytoplasmic vacuole from a contaminated cell  
745 culture. Panel iii is from a CB MK culture co-incubated with live *S. pyogenes* showing association  
746 of the bacteria with a platelet cell membrane. (C) CB MKs were co-incubated with live pHrodo-  
747 conjugated bacteria. This is a representative image of a control cell along with a cell co-incubated  
748 with *E. coli*. (D) Meg-01 cells were co-incubated with pHrodo-conjugated live *E. coli* and then  
749 imaged. Bacteria, red arrow; pseudopodes, yellow arrow.  
750

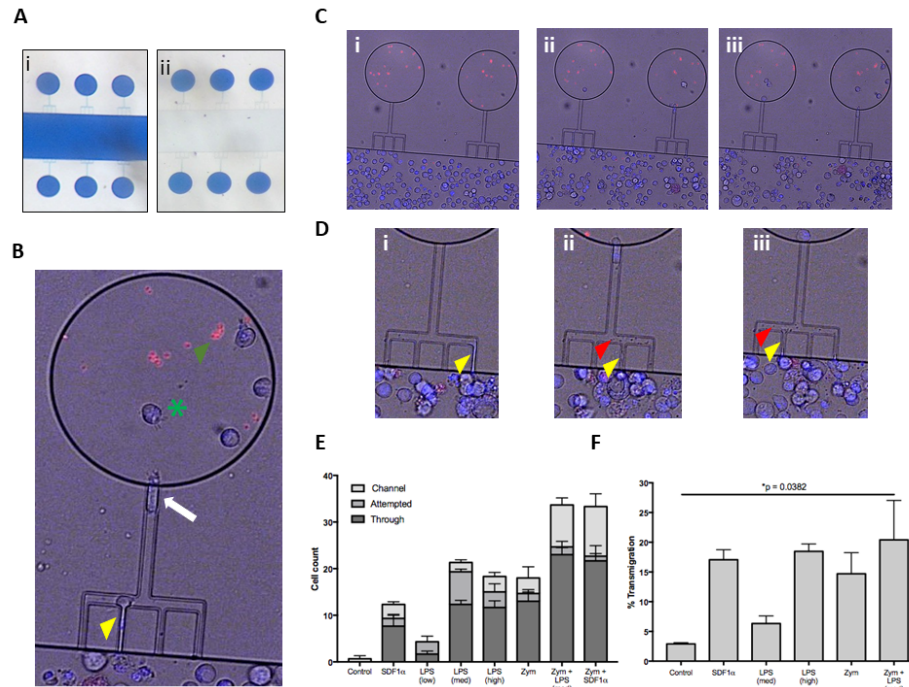

751

752

753 **Figure 2. Meg-01 cells are capable of chemotaxis to pathogenic stimulus.** Meg-01 cells were  
 754 tested for their ability to chemotax towards LPS and zymosan particles. (A) A microfluidic device  
 755 was used for part of the chemotaxis experiments. In this device, the main channel is connected to  
 756 a circular reservoir by four 6 μm channels and a larger 8 μm connecting channel in a comb-like  
 757 arrangement. The device is first primed with the condition (panel i) and the main channel is then  
 758 flushed with media in order to create a concentration gradient from the ‘lollipops’ into the main  
 759 channel (panel ii). (B) The MKs are stained with Hoechst for positive identification and then  
 760 manually tracked. The behavior of the MK was divided into 3 categories: cells attempting to enter  
 761 the channel (yellow arrowhead), cells inside the channel (white arrow), and cells through the  
 762 channel and inside the reservoir (green arrowhead). Zymosan particles are marked with a green  
 763 asterisk. (C) Time lapse image of MKs migrating into the lollipops which are primed with LPS  
 764 (360 pg/mL) and zymosan particles. (D) Close-up of time-lapse image were MKs are observed to  
 765 attempt to enter the channel, extend a portion of the cell into the side channel (yellow arrowhead),  
 766 and then bud off small platelet-like particles (red arrowhead). (E) Bar graph representing MK  
 767 chemotaxis within the microfluidic device. (F) Bar graph representing MK chemotaxis within a  
 768 transwell device, confirming the same observation as within the microfluidic device. LPS low, 22  
 769 pg/mL; LPS med, 220 pg/mL; LPS high, 2.2 ng/mL; Zym, zymosan particles; Zym+LPS, zymosan  
 770 particles with 220 pg/mL LPS. Bar graphs are the mean with standard error bars.  
 771



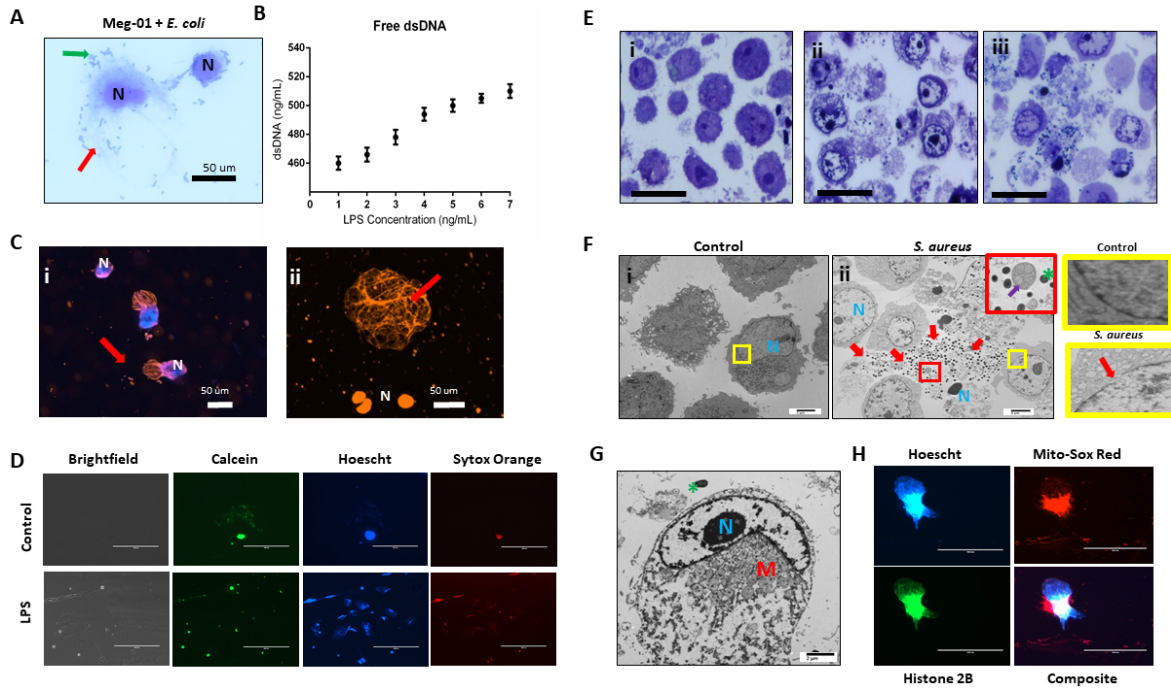

772

773 **Figure 3. MK release chromatin webs.** CB MKs and Meg-01 cells were observed to release  
774 chromatin webs in response to pathogenic stimulus. (A) Meg-01 cells co-incubated with live *E.*  
775 *coli* and undergo cell lysis (diff-quick stain). Green arrow: bacteria; red arrow: extracellular  
776 cytoplasm. (B) The amount of chromatin released from Meg-01 cells after incubation with  
777 increasing concentrations of LPS was quantified using a PicoGreen assay. (C) CB MKs release  
778 chromatin webs after incubation with live pHrodo-conjugated *E. coli* produce. Live cells are  
779 stained blue with Hoechst dye. Chromatin webs are stained orange with Sytox dye. Subpanel i  
780 depicts two CB MKS with nucleus (blue) and chromatin webs (orange). Subpanel ii depicts 4 CB  
781 MKs, one that has released a chromatin web (top) and three dead cells with stained nuclei (bottom).  
782 (D) Meg-01 cells in media have intact cell membranes and proplatelet buddings (calcein staining).  
783 Cells incubated with LPS have scant calcein and abundant sytox (chromatin) staining. (E) Meg-01  
784 cells incubated with various live bacteria display swollen nuclei, broken nuclear membranes,  
785 chromatin webs, extracellular granules, and bacteria associated with intra- and extracellular  
786 contents (light microscopy). Panel i is the control, and panels ii and iii are co-incubated with *E.*  
787 *coli* and *S. aureus*, respectively. (F) Transmission electron microscopy (TEM) of Meg-01 cells in  
788 media (control) reveal an intact nuclear membrane (panel i) and limited extracellular content. Meg-  
789 01 cells co-incubated with live bacteria display swollen nuclei (N), broken nuclear membranes,  
790 extracellular cytoplasmic contents (including granules and mitochondria), and an abundance of  
791 bacteria primarily associated with this extracellular content (red arrows – panel ii). The red  
792 magnified section in panel ii demonstrates the presence of extracellular mitochondria (purple  
793 arrow) and the yellow magnified sections on the right demonstrate an intact nuclear membrane in  
794 a control cell (top right) and a cell co-incubated with bacteria that has a break in the nuclear  
795 membrane (bottom right). (G) TEM image of a Meg-01 cell co-incubated with live *E. coli*  
796 exhibiting a swollen nucleus and a rearrangement of mitochondria surrounding the nucleus. (H)  
797 Meg-01 cells transfected with Bacmam H2b-GFP released chromatin webs that were both positive  
798 for DNA (Hoechst) and histone 2B. Mitochondrial staining with MitoSox red shows active  
799 mitochondria in a perinuclear arrangement, confirming the TEM findings from panel G.

800

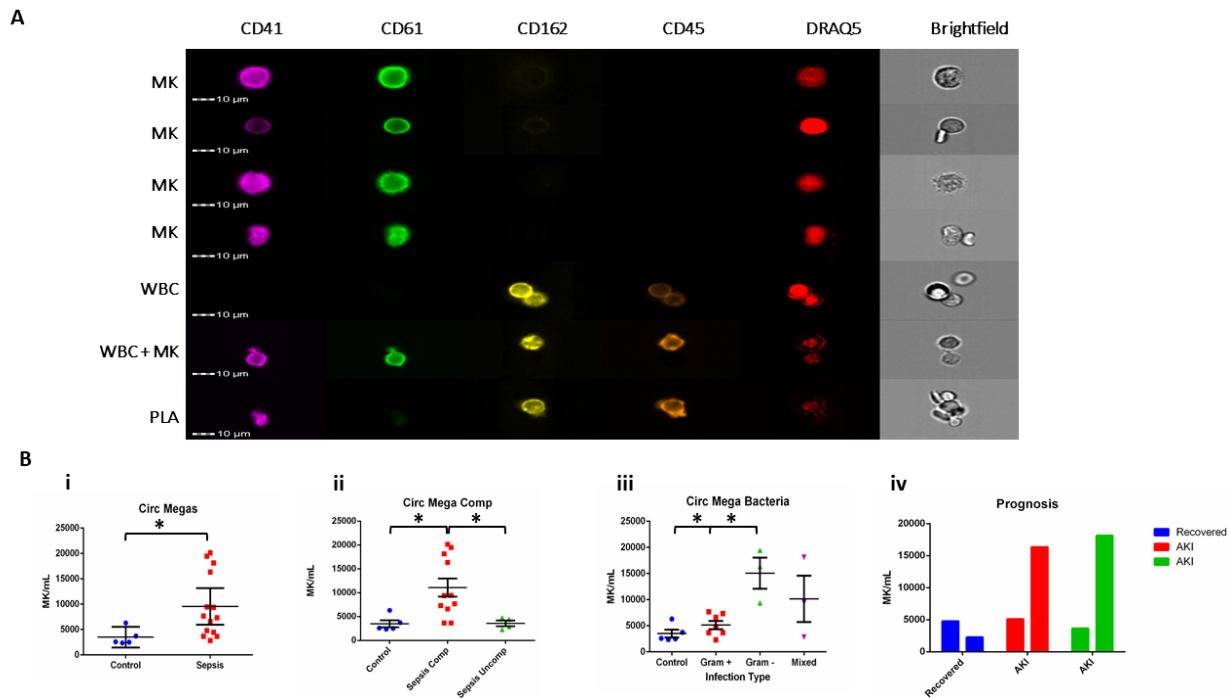

801

802

803 **Figure 4. MKs are present in increased amounts in the circulation during sepsis.** Samples  
 804 from patients diagnosed with sepsis were evaluated for the presence of possible MKs. MKs were  
 805 identified in the peripheral circulation based on the simultaneous expression of CD41, CD61, and  
 806 DRAQ5. (A) Imaging flow cytometry was used to identify and quantify circulating  
 807 CD41+CD61+Draq5+ cells in the peripheral circulation. CD45 and CD162 were used as white  
 808 blood cell markers. The top 4 panels show examples of MKs, while the bottom three panels show  
 809 examples of two white blood cells, a white blood cell attached to a MK, and a white blood cell  
 810 attached to a platelet (PLA). The cells that stain negative for all stains in the images are most likely  
 811 red blood cells.). (B) Circulating MKs were significantly higher in the peripheral circulation in  
 812 patients with sepsis (i). The amount of MKs was correlated with sepsis-related complications,  
 813 including ARDS and AKI, with ‘complicated’ sepsis having significantly higher MKs than  
 814 ‘uncomplicated’ sepsis (ii). MKs were also noted to be higher in gram negative and mixed  
 815 infections, as compared to gram positive only infections (iii). Sequential blood samples on day 1  
 816 and 3 of sepsis hospitalization suggested that there also may be a correlation with recovery and the  
 817 development of sepsis complications, such as AKI (iv). Significance is calculated via student t-test  
 818 with significance being defined as  $p < 0.05$  (\*). No statistical analysis was performed on B(iv) due  
 819 to the small sample size ( $n = 1$  per group).

820

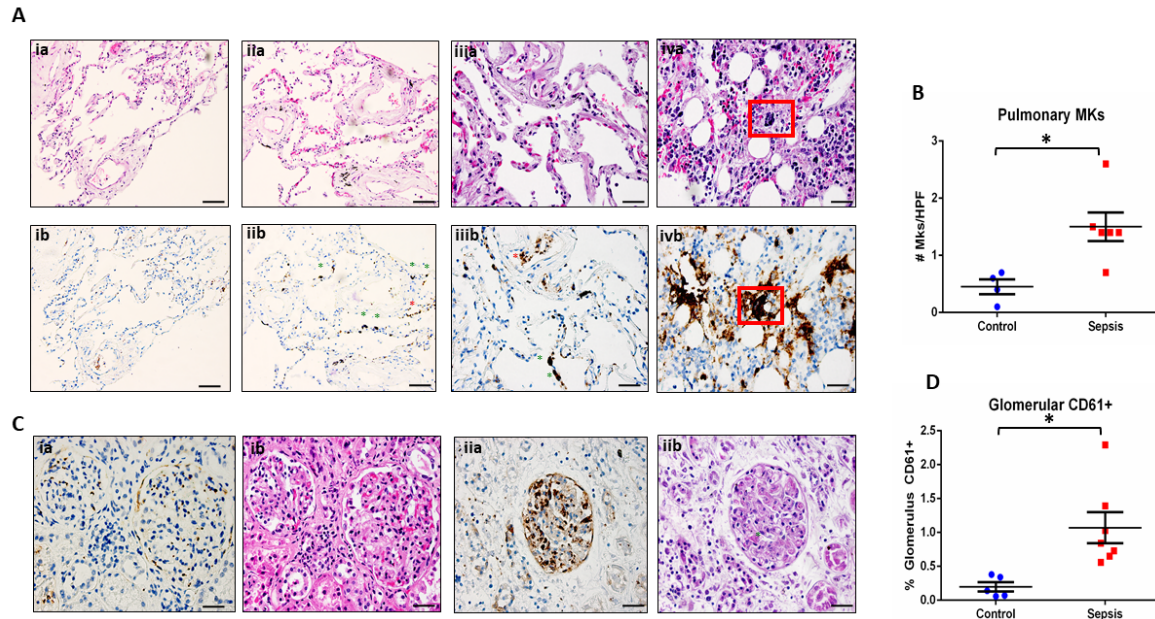

821

822 **Figure 5. MKs are present in increased amounts in the peripheral organs during sepsis.**  
823 Autopsy pathology samples from patients that died from sepsis were evaluated for MKs. (A) MKs  
824 in the lungs were defined as being large cells with dark, homogenous CD61+ staining (brown). An  
825 example of a lung image from a patient that died from heart disease as a negative control is shown  
826 in panel ia (hematoxylin and eosin, H&E) and ib (CD61). In these images there are no MKs  
827 observed. A representative image of two lung images from a patient that died from sepsis are  
828 shown in panel iia/iia (H&E) and iib/iib (CD61), showing multiple MKs (green asterisks).  
829 Platelet staining is also noted (red asterisks). While in some cases, a large dark staining basophilic  
830 nucleus can be seen in the H&E in the area of the CD61 staining, this is not always the case and  
831 may be due to sectioning through the sample and imaging different planes. This also suggests that  
832 CD61 may be more accurate when counting MKs than H&E. A sample of bone marrow from a  
833 sepsis patient is shown in panel iva (H&E) and ivb (CD61) as an example of a MK with CD61  
834 staining as a positive control (red box). (B) Glomeruli were also evaluated for the presence of  
835 increased CD61 staining. Individual MKs could not be reliably counted within the MKs, therefore  
836 percent of CD61 stain/glomeruli was evaluated. A glomerulus from a control patient is shown in  
837 panel ia (CD61) and ib (H&E), with minimal CD61 staining. This is in contrast to a glomerulus  
838 from a patient with sepsis and disseminated intravascular coagulation (DIC), which has much  
839 higher amounts of CD61 staining along with microvascular thrombi within the glomerular  
840 capillaries (green asterisk). Upon evaluation, there was significantly higher pulmonary MKs (C)  
841 and glomerular CD61 staining (D) in the sepsis patients as compared to control. Significance is  
842 calculated via student t-test with significance being defined as  $p < 0.05$  (\*). Scale bars are: Ai-ii,  
843 100  $\mu\text{m}$ , Aiii-iv and C, 50  $\mu\text{m}$ .
